# Supplementary material for: A wedge strategy for mitigation of urban warming in future climate scenarios
Source: Copernicus journal article supplement (doi:10.5194/acp-17-9067-2017), 2017-07-27
Supplement: Supplementary file 1 [file acp-17-9067-2017-supplement.zip]

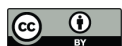

## *Supplement of*

# **A wedge strategy for mitigation of urban warming in future climate scenarios**

**Lei Zhao et al.**

*Correspondence to:* Lei Zhao ([lei.zhao@princeton.edu](mailto:lei.zhao@princeton.edu))

- [acp-17-9067-2017-supplement-title-page.pdf](#)
- [Supplementary\\_submit\\_LeiZhao.pdf](#)
- [animation\\_movie1.avi](#)
- [animation\\_movie2.avi](#)

The copyright of individual parts of the supplement might differ from the CC BY 3.0 License.
